# Supplementary material for: Change of Petals′ Color and Chemical Components in Oenothera Flowers during Senescence
Source: Molecules. 2018 Jul 12;23(7):1698. doi: 10.3390/molecules23071698 (PMC6099532; doi:10.3390/molecules23071698)

Supporting Information

## Mechanism of petal color change of *Oenothera* flowers during senescence by chemical analysis of flavonoid content

Yada Teppabut, Kin-ichi Oyama, Tadao Kondo and Kumi Yoshida

Supplementary materials

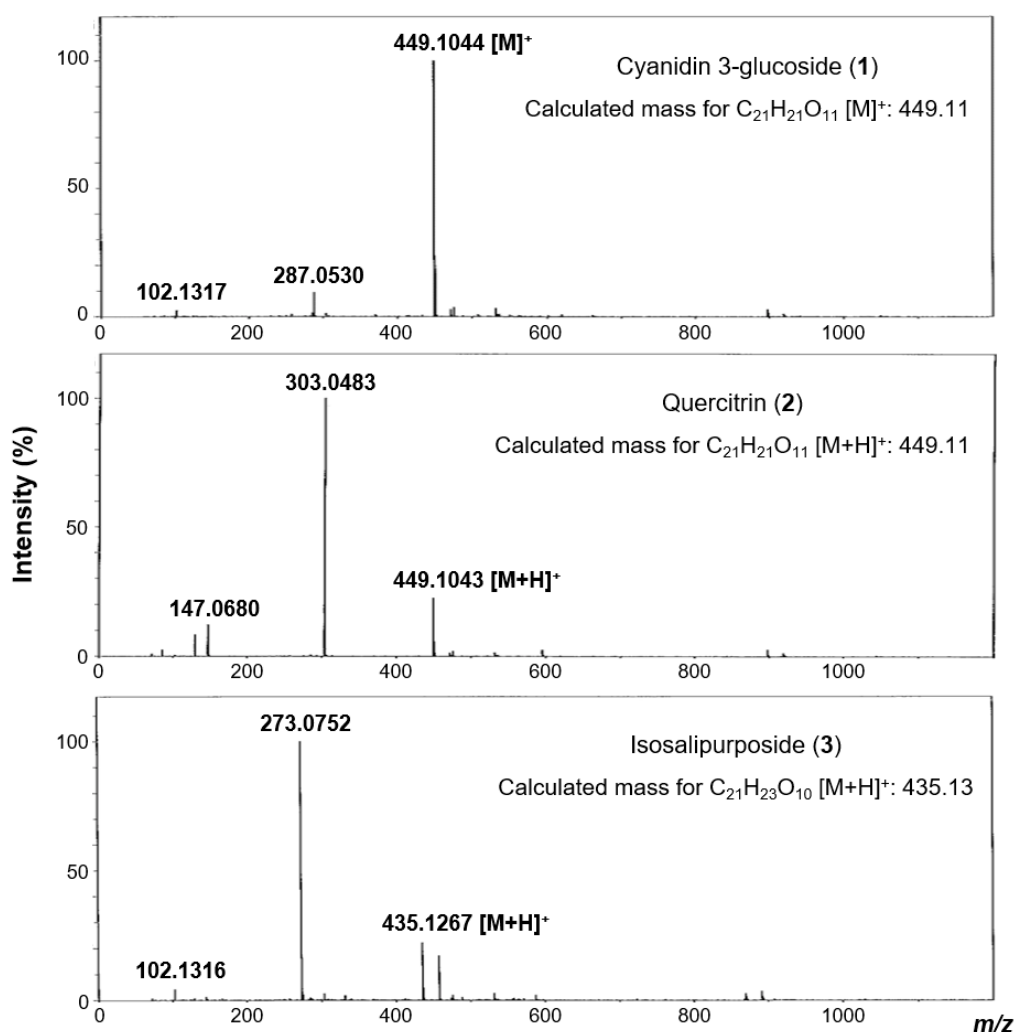

**Figure S1.** The LC-MS spectra of Cy3G (1), quercitrin (2) and isosalipurposide (3) from the extracts of *Oenothera* flowers. The spectra of Cy3G (1) and quercitrin (2) were obtained from the extract of *Oenothera tetrapetala*, whereas the spectra of Cy3G (1) and isosalipurposide (3) was observed in *Oenothera laciniata* petal's extract.

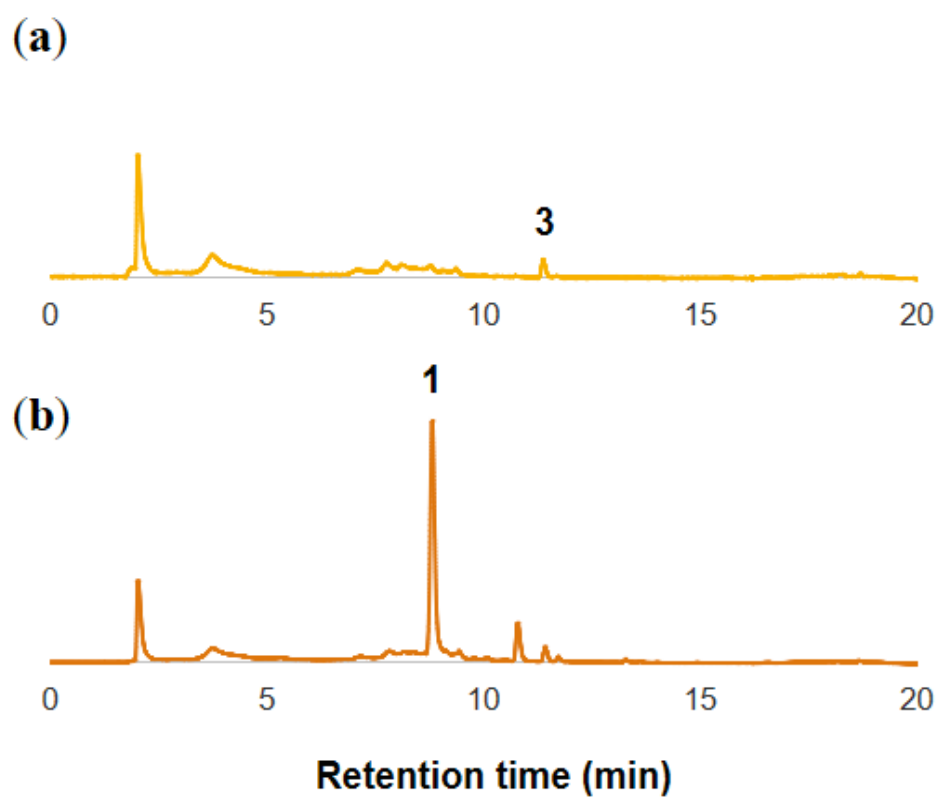

**Figure S2.** HPLC chromatogram of the extracts from petals of *O. stricta*. (a) Yellow petals at 0 h; (b) Orange petals at 12 h.

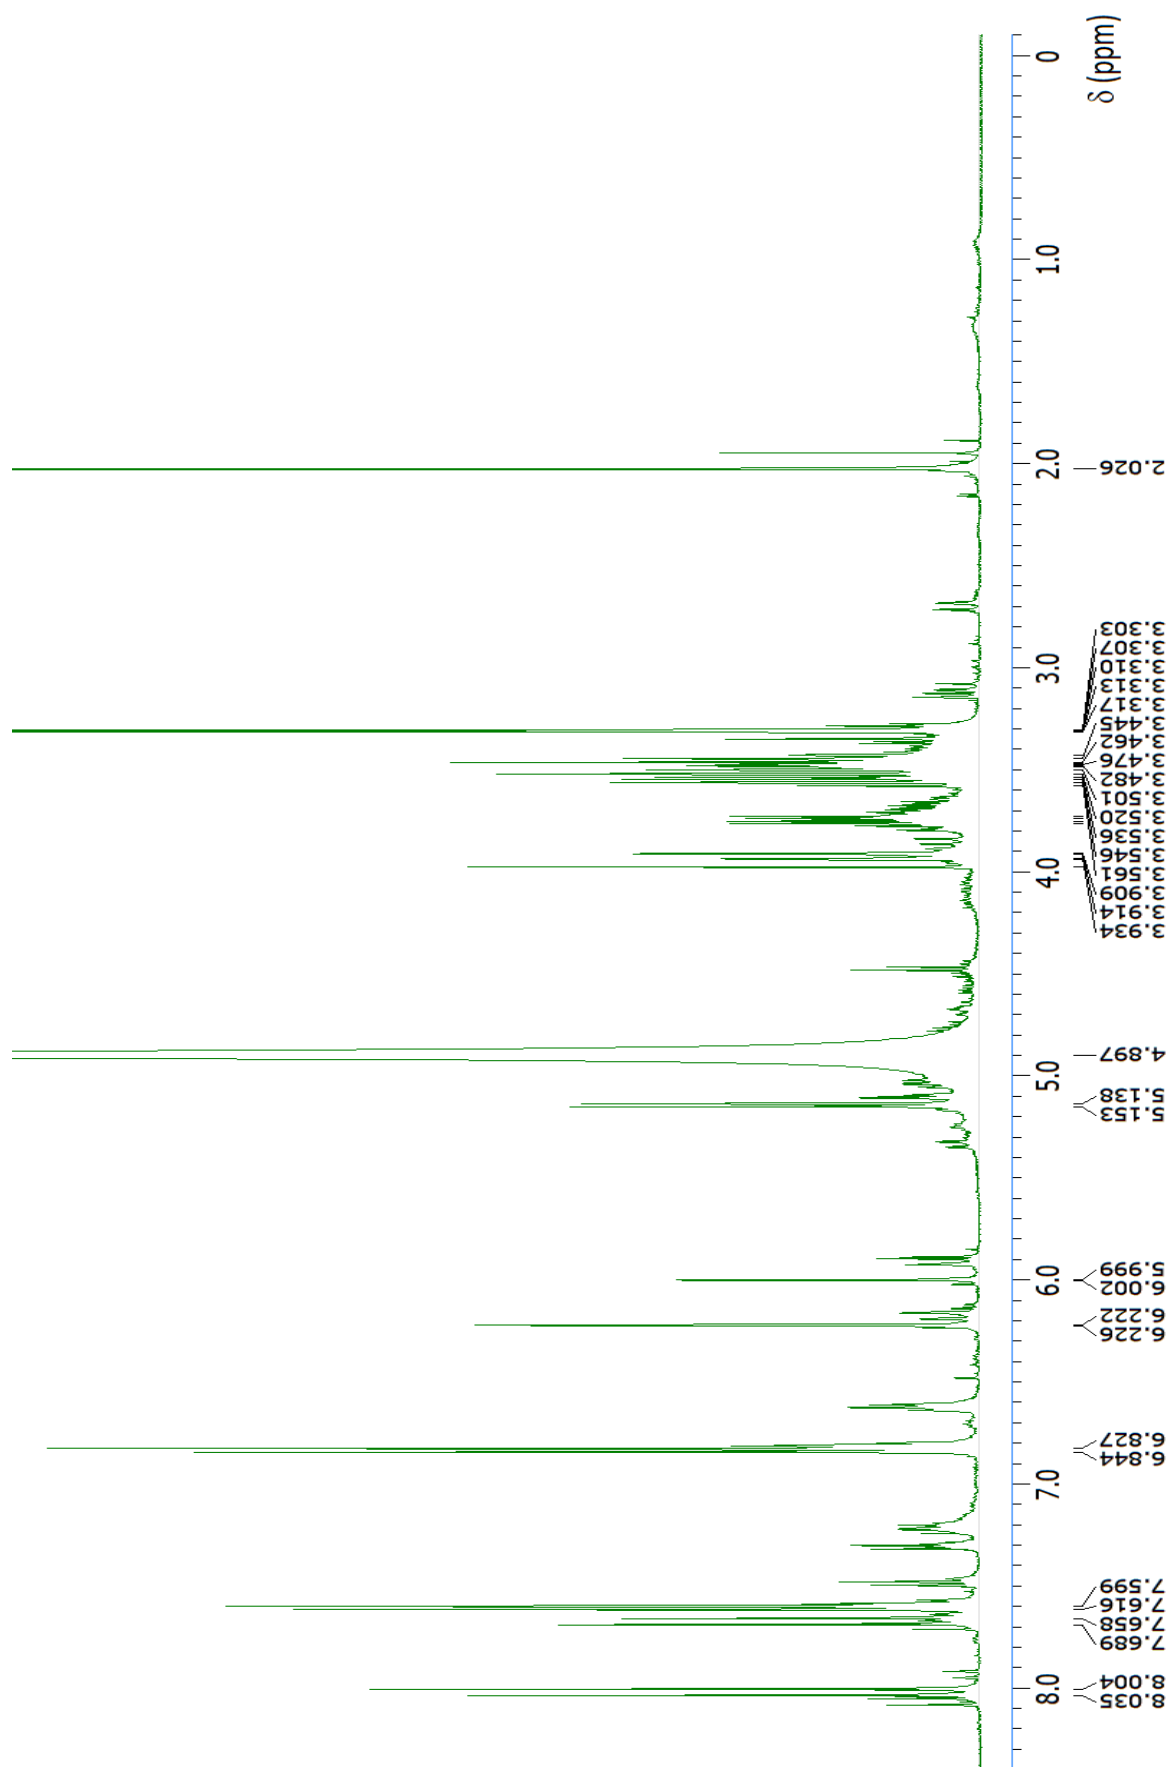

**Figure S3.** The  $^1\text{H}$  NMR spectrum (500 MHz) of isosalipurposide (3) in  $\text{CD}_3\text{OD}$  at  $25^\circ\text{C}$ .

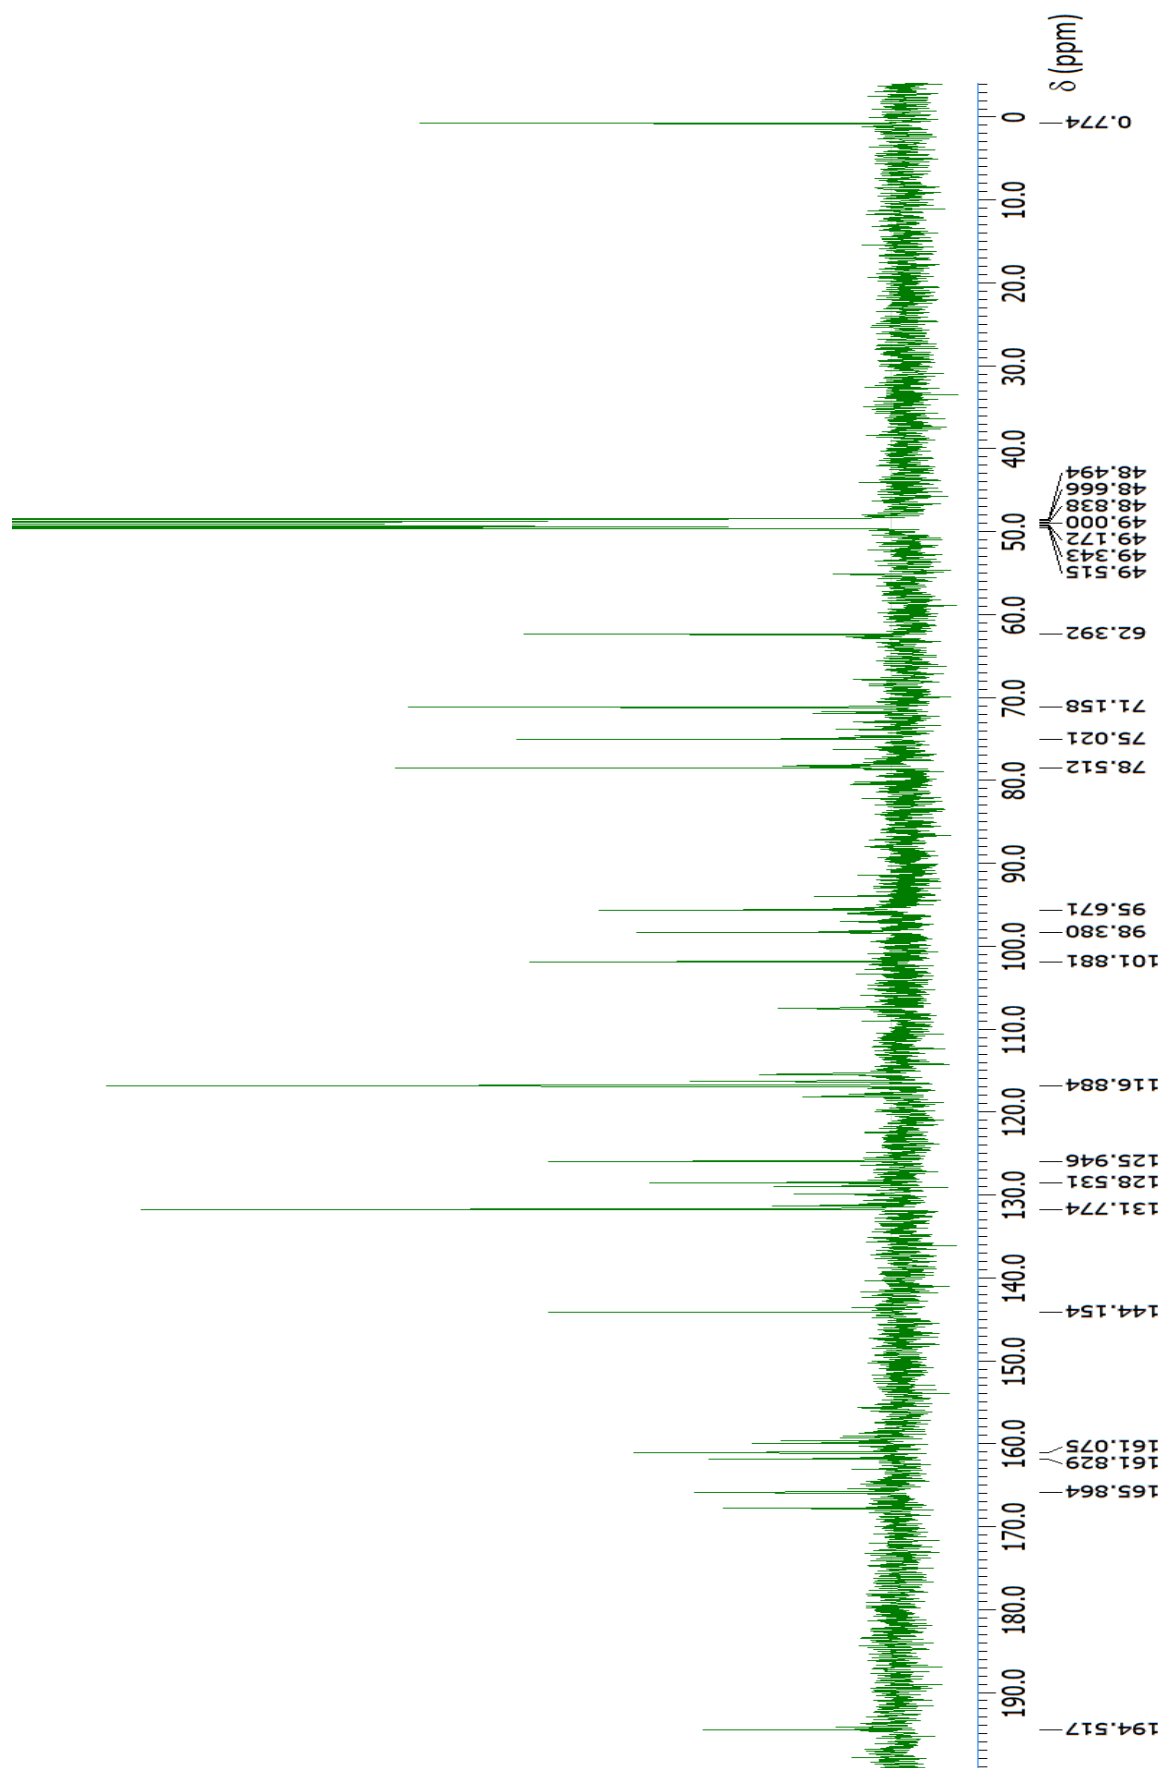

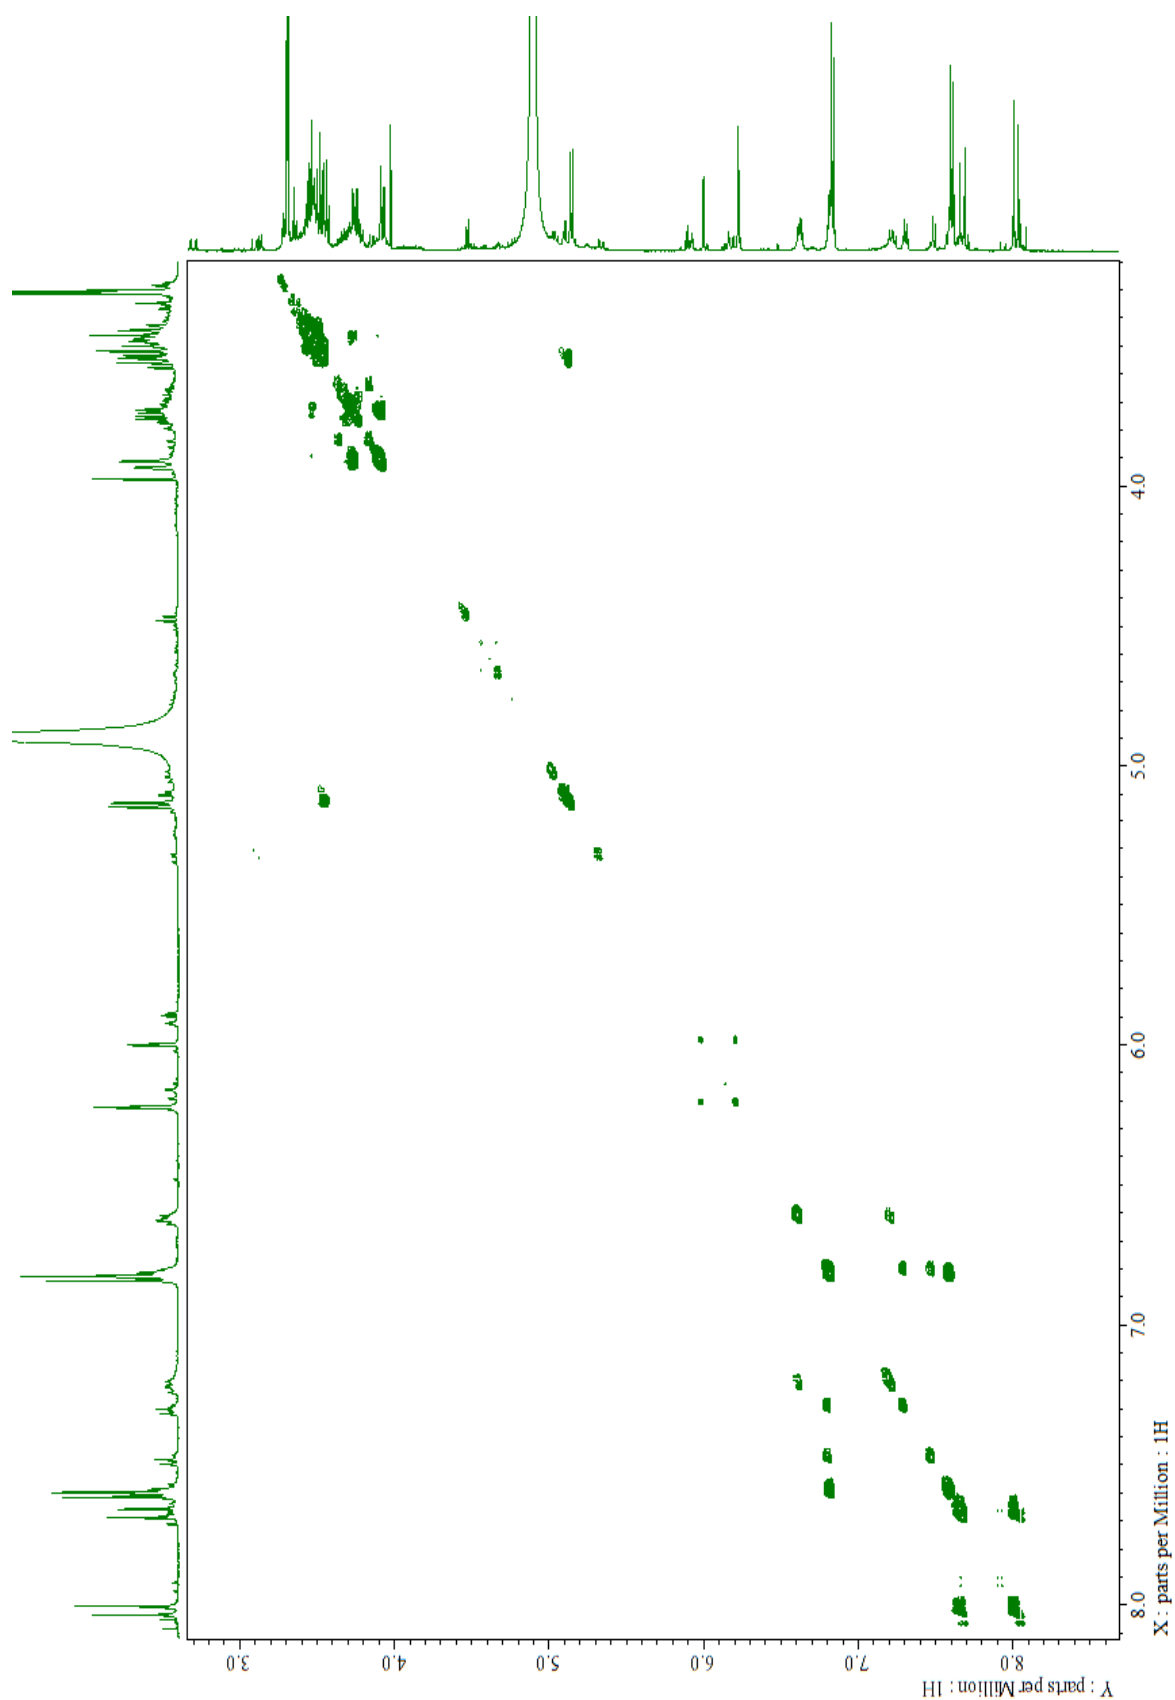

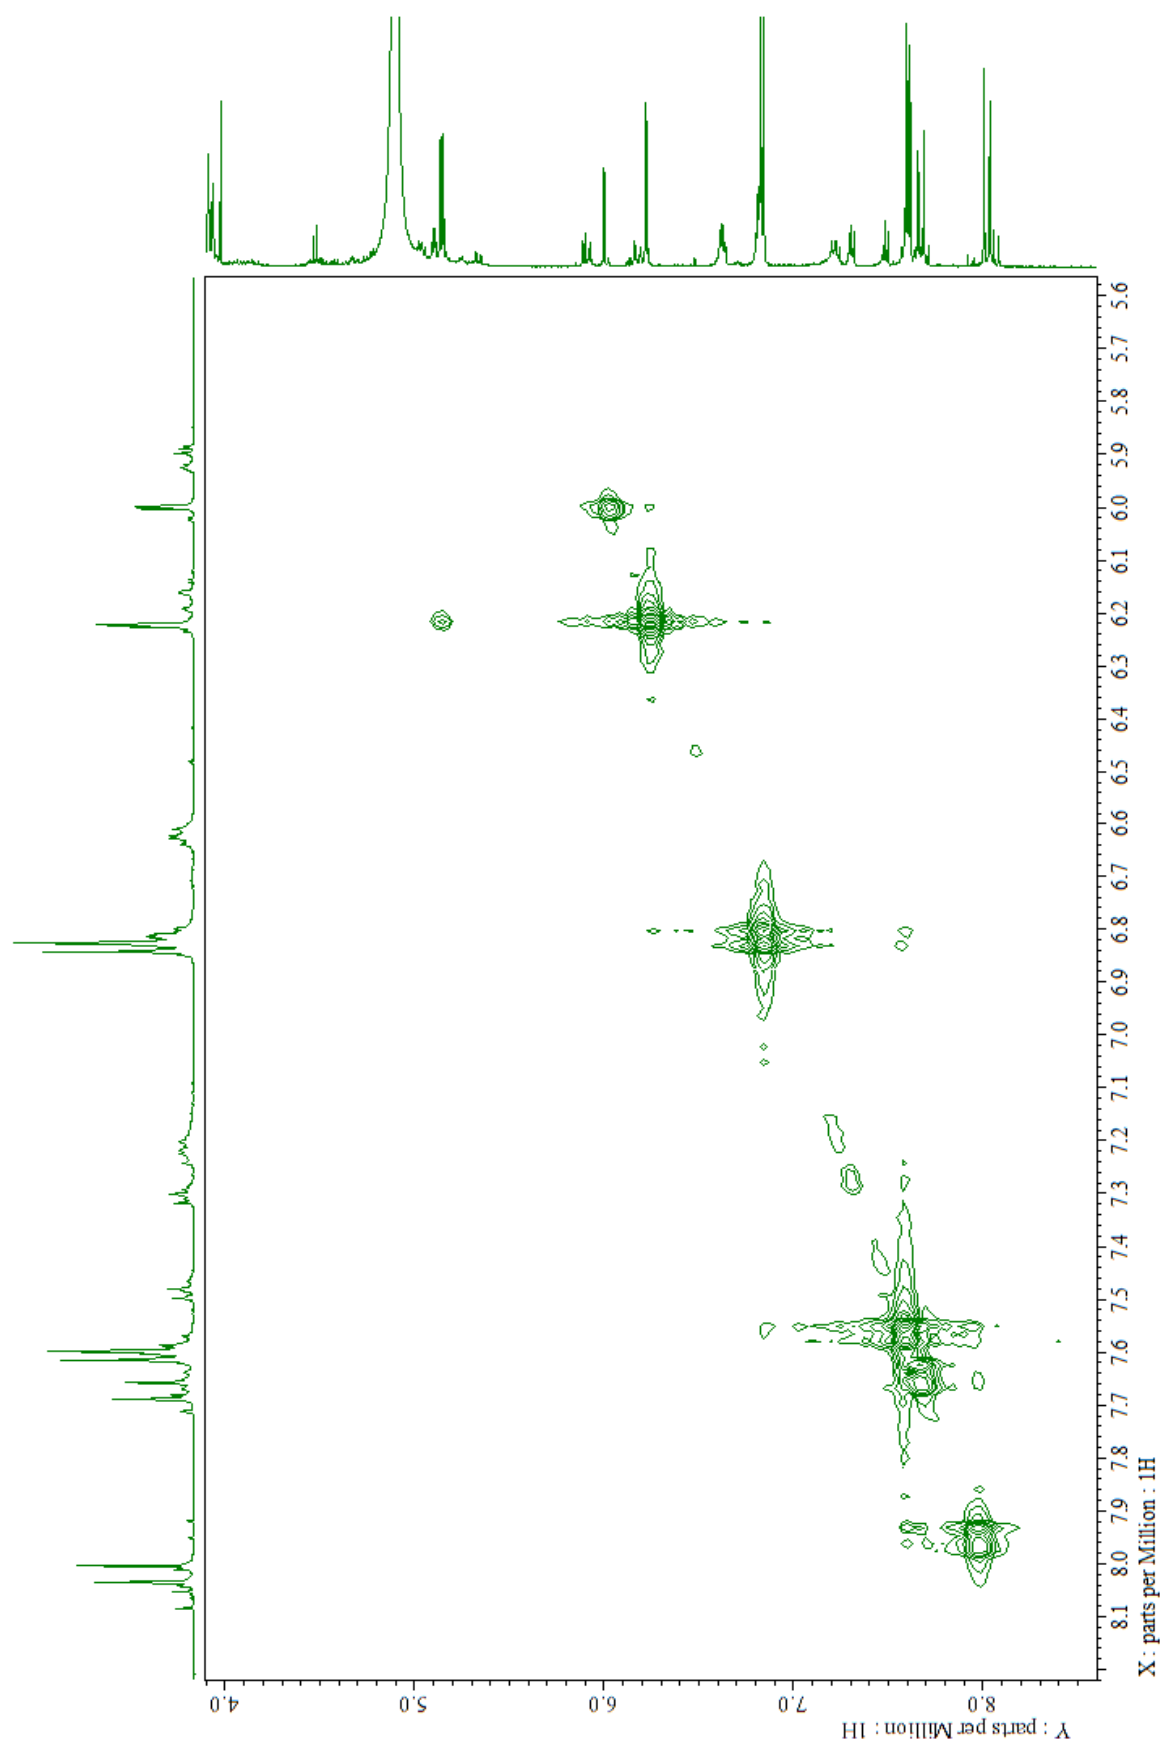

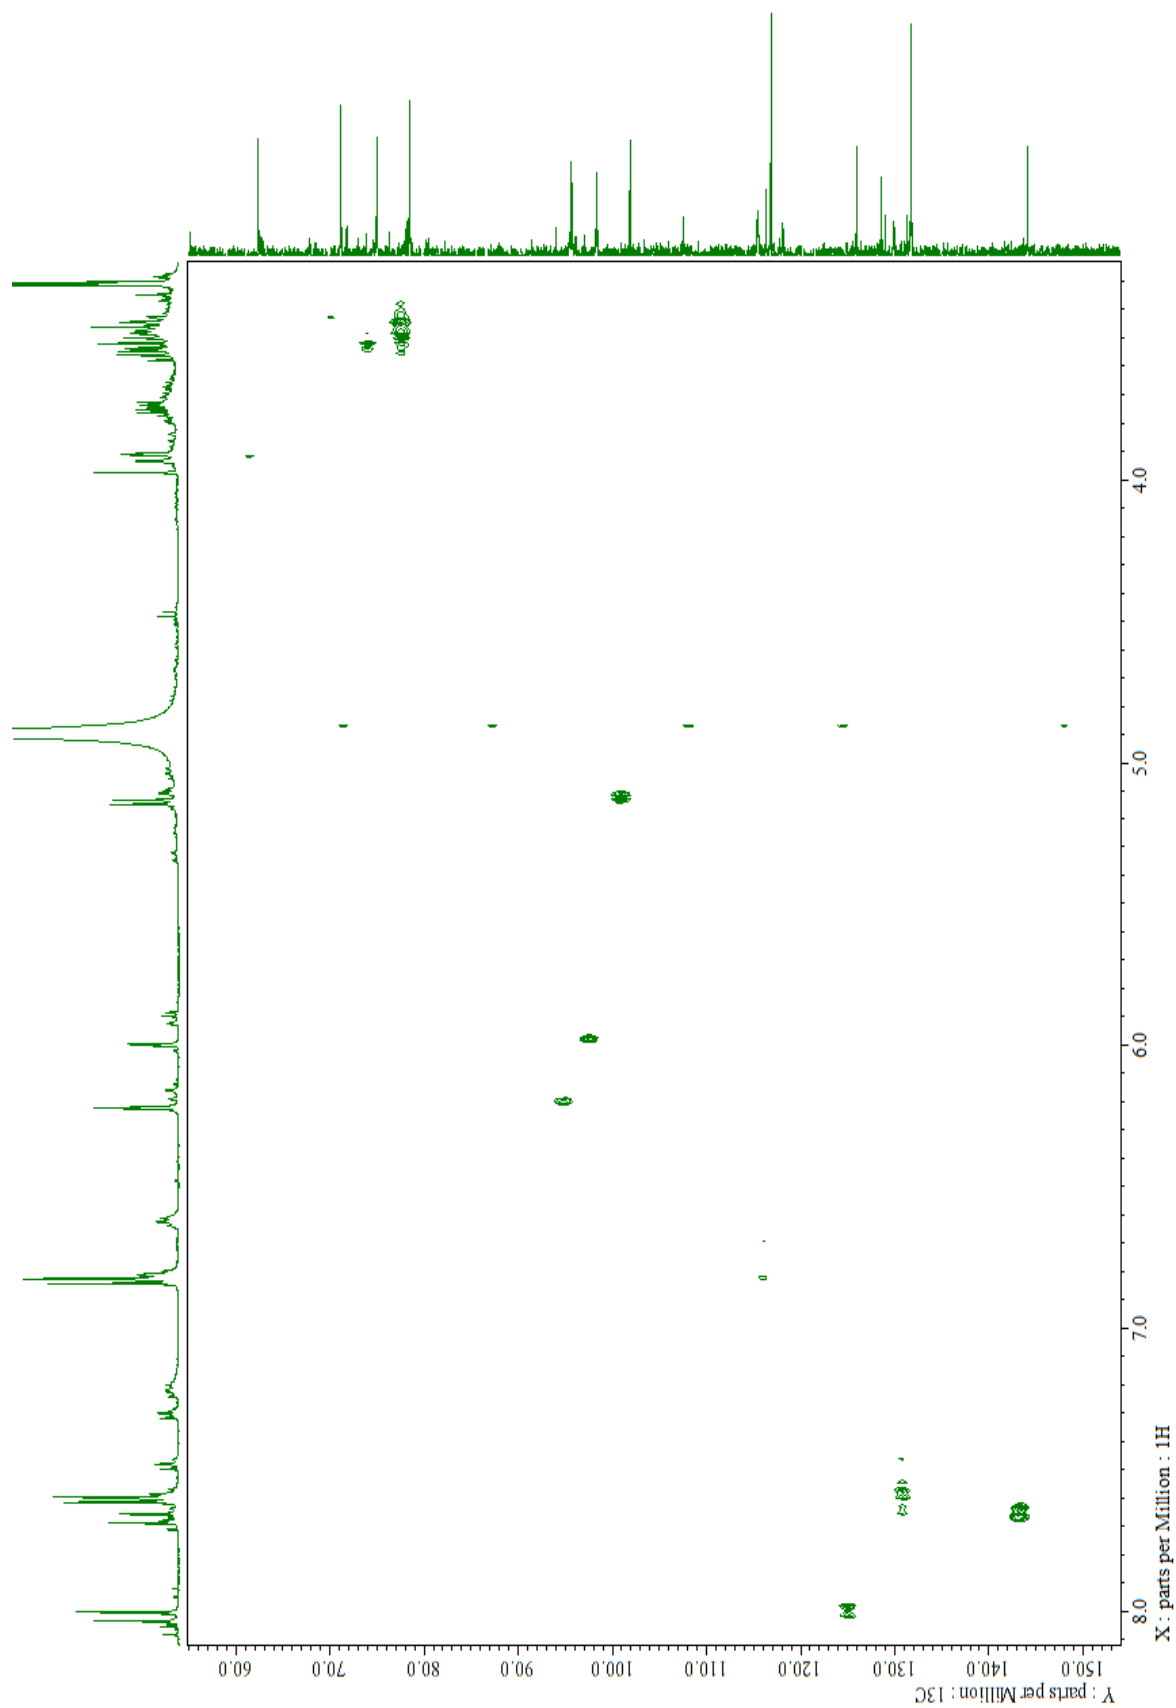

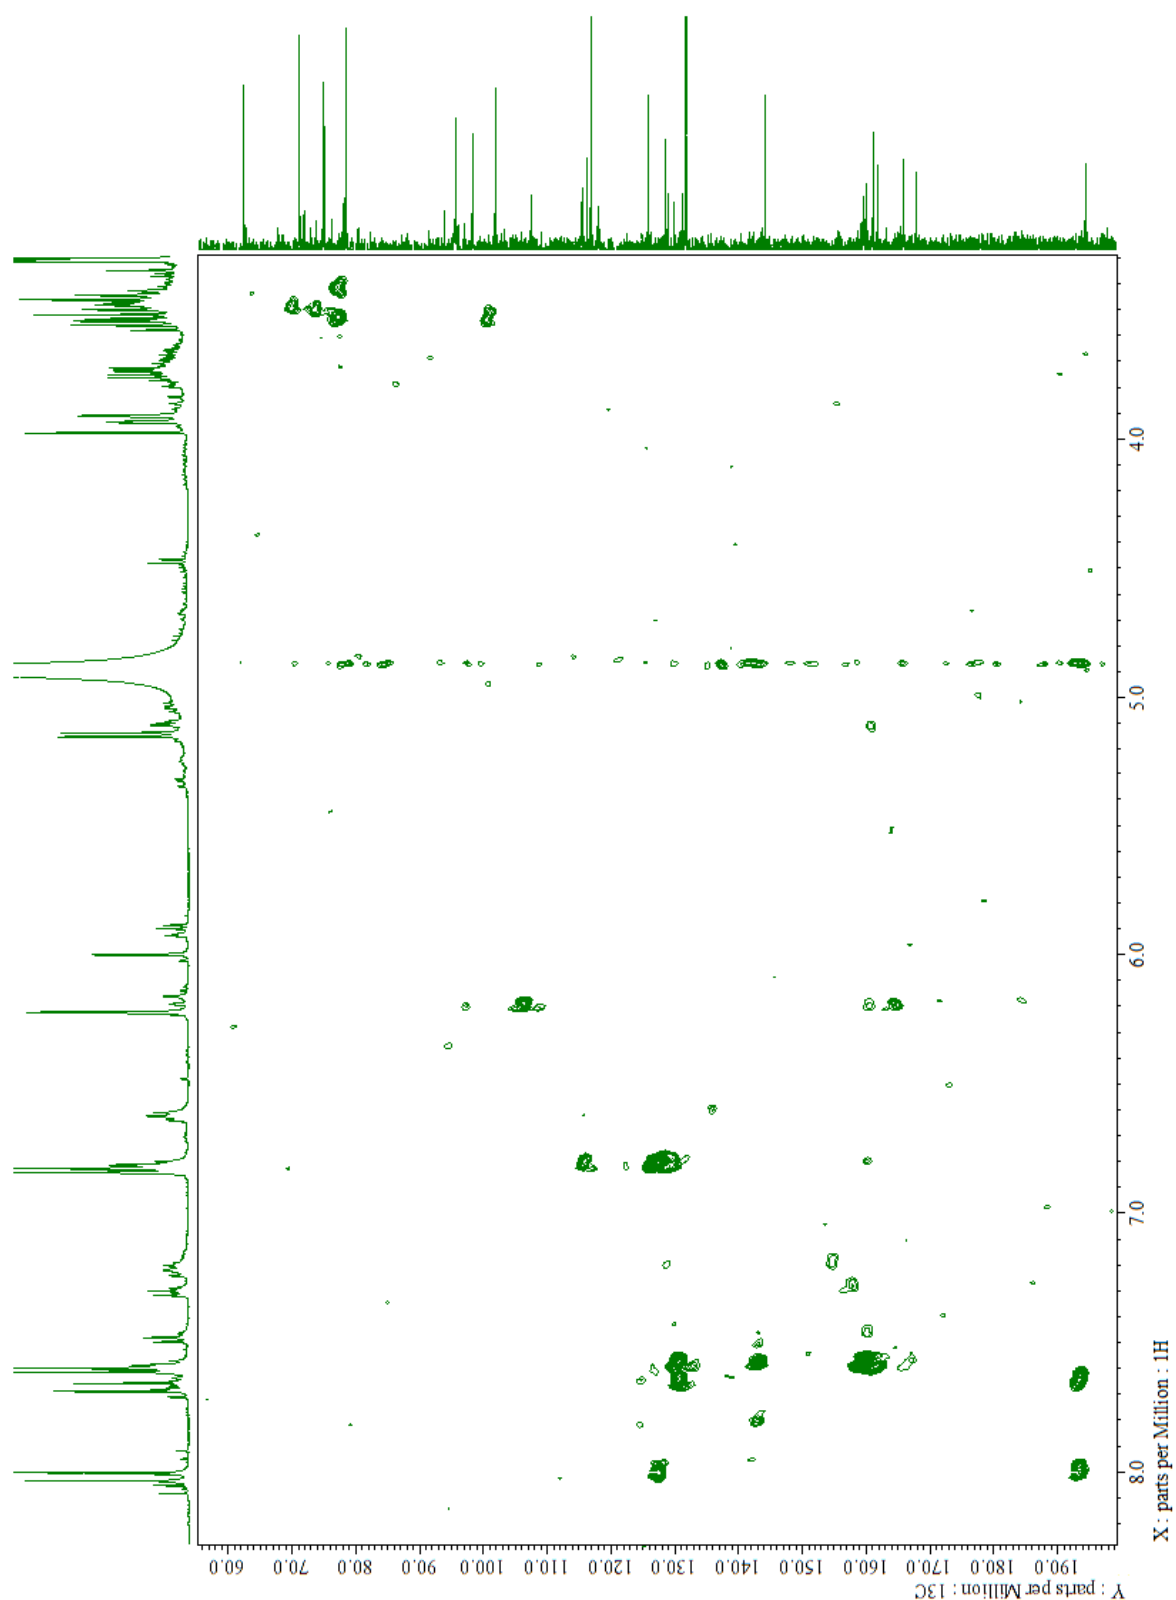

**Figure S8.** The HMBC spectrum of isosalipurposide (**3**) in CD<sub>3</sub>OD at 25 °C.

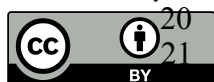

Supplement: Supplementary file 1 [file molecules-23-01698-s001.pdf]
